# Supplementary material for: Dementia Incidence in Quebec Over 20 Years
Source: PubMed Central journal article supplement (PMC11612831; doi:10.1001/jamanetworkopen.2024.47346), 2024-12-02
Supplement: jamanetwopen-e2447346-s001.pdf [file jamanetwopen-e2447346-s001.pdf]

## Data Sharing Statement

Godard-Sebillotte. Dementia Incidence in Quebec Over 20 Years. *JAMA Netw Open*.  
Published December 02, 2024. doi:10.1001/jamanetworkopen.2024.47346

### Data

**Data available:** Yes

**Data types:** Data (not involving human participants)

**How to access data:** The data used in the current study are held at the Institut national de santé publique du Québec: data access may be requested from the institution for authorised purposes.

**When available:** With publication

### Supporting Documents

**Document types:** None

### Additional Information

**Who can access the data:** Researchers whose proposed use of the data has been approved.

**Types of analyses:** For purposes approved by the INSPQ.

**Mechanisms of data availability:** After approval of a proposal.

**Any additional restrictions:** CGS had full access to all the data in the study and takes responsibility for the integrity of the data and the accuracy of the data analysis.
